# Supplementary material
Source: PubMed Central journal article supplement (PMC5499150)
Supplement: NIHMS861667-supplement.pdf [file NIHMS861667-supplement.pdf]

| Section/topic                                                                                                                                                                                                                                                                                                                                                                                                                                                                                                                                                                                                                                                   | Item number | Checklist item                                                                                                                                                                              | Reported on page number |    |
|-----------------------------------------------------------------------------------------------------------------------------------------------------------------------------------------------------------------------------------------------------------------------------------------------------------------------------------------------------------------------------------------------------------------------------------------------------------------------------------------------------------------------------------------------------------------------------------------------------------------------------------------------------------------|-------------|---------------------------------------------------------------------------------------------------------------------------------------------------------------------------------------------|-------------------------|----|
| <b>Title and abstract</b>                                                                                                                                                                                                                                                                                                                                                                                                                                                                                                                                                                                                                                       |             |                                                                                                                                                                                             |                         |    |
|                                                                                                                                                                                                                                                                                                                                                                                                                                                                                                                                                                                                                                                                 | 1a          | Identification as a randomised trial in the title                                                                                                                                           | N/A                     |    |
|                                                                                                                                                                                                                                                                                                                                                                                                                                                                                                                                                                                                                                                                 | 1b          | Structured summary of trial design, methods, results, and conclusions (for specific guidance see CONSORT for abstracts <sup>21,31</sup> )                                                   | 3-4                     |    |
| <b>Introduction</b>                                                                                                                                                                                                                                                                                                                                                                                                                                                                                                                                                                                                                                             |             |                                                                                                                                                                                             |                         |    |
| Background and objectives                                                                                                                                                                                                                                                                                                                                                                                                                                                                                                                                                                                                                                       | 2a          | Scientific background and explanation of rationale                                                                                                                                          | 5                       |    |
|                                                                                                                                                                                                                                                                                                                                                                                                                                                                                                                                                                                                                                                                 | 2b          | Specific objectives or hypotheses                                                                                                                                                           | 5-7                     |    |
| <b>Methods</b>                                                                                                                                                                                                                                                                                                                                                                                                                                                                                                                                                                                                                                                  |             |                                                                                                                                                                                             |                         |    |
| Trial design                                                                                                                                                                                                                                                                                                                                                                                                                                                                                                                                                                                                                                                    | 3a          | Description of trial design (such as parallel, factorial) including allocation ratio                                                                                                        | 8-9                     |    |
|                                                                                                                                                                                                                                                                                                                                                                                                                                                                                                                                                                                                                                                                 | 3b          | Important changes to methods after trial commencement (such as eligibility criteria), with reasons                                                                                          | 9                       |    |
| Participants                                                                                                                                                                                                                                                                                                                                                                                                                                                                                                                                                                                                                                                    | 4a          | Eligibility criteria for participants                                                                                                                                                       | 8                       |    |
|                                                                                                                                                                                                                                                                                                                                                                                                                                                                                                                                                                                                                                                                 | 4b          | Settings and locations where the data were collected                                                                                                                                        | 12                      |    |
| Interventions                                                                                                                                                                                                                                                                                                                                                                                                                                                                                                                                                                                                                                                   | 5           | The interventions for each group with sufficient details to allow replication, including how and when they were actually administered                                                       | 9                       |    |
| Outcomes                                                                                                                                                                                                                                                                                                                                                                                                                                                                                                                                                                                                                                                        | 6a          | Completely defined prespecified primary and secondary outcome measures, including how and when they were assessed                                                                           | 8-9                     |    |
|                                                                                                                                                                                                                                                                                                                                                                                                                                                                                                                                                                                                                                                                 | 6b          | Any changes to trial outcomes after the trial commenced, with reasons                                                                                                                       | 8-9, 12-14              |    |
| Sample size                                                                                                                                                                                                                                                                                                                                                                                                                                                                                                                                                                                                                                                     | 7a          | How sample size was determined                                                                                                                                                              | 8-10                    |    |
|                                                                                                                                                                                                                                                                                                                                                                                                                                                                                                                                                                                                                                                                 | 7b          | When applicable, explanation of any interim analyses and stopping guidelines                                                                                                                | 8-9                     |    |
| <b>Randomisation</b>                                                                                                                                                                                                                                                                                                                                                                                                                                                                                                                                                                                                                                            |             |                                                                                                                                                                                             |                         |    |
| Sequence generation                                                                                                                                                                                                                                                                                                                                                                                                                                                                                                                                                                                                                                             | 8a          | Method used to generate the random allocation sequence                                                                                                                                      | N/A                     |    |
|                                                                                                                                                                                                                                                                                                                                                                                                                                                                                                                                                                                                                                                                 | 8b          | Type of randomisation; details of any restriction (such as blocking and block size)                                                                                                         |                         |    |
| Allocation concealment mechanism                                                                                                                                                                                                                                                                                                                                                                                                                                                                                                                                                                                                                                | 9           | Mechanism used to implement the random allocation sequence (such as sequentially numbered containers), describing any steps taken to conceal the sequence until interventions were assigned |                         |    |
| Implementation                                                                                                                                                                                                                                                                                                                                                                                                                                                                                                                                                                                                                                                  | 10          | Who generated the random allocation sequence, who enrolled participants, and who assigned participants to interventions                                                                     |                         |    |
| Blinding                                                                                                                                                                                                                                                                                                                                                                                                                                                                                                                                                                                                                                                        | 11a         | If done, who was blinded after assignment to interventions (for example, participants, care providers, those assessing outcomes) and how                                                    |                         |    |
|                                                                                                                                                                                                                                                                                                                                                                                                                                                                                                                                                                                                                                                                 | 11b         | If relevant, description of the similarity of interventions                                                                                                                                 |                         |    |
| Statistical methods                                                                                                                                                                                                                                                                                                                                                                                                                                                                                                                                                                                                                                             | 12a         | Statistical methods used to compare groups for primary and secondary outcomes                                                                                                               |                         |    |
|                                                                                                                                                                                                                                                                                                                                                                                                                                                                                                                                                                                                                                                                 | 12b         | Methods for additional analyses, such as subgroup analyses and adjusted analyses                                                                                                            |                         |    |
| <b>Results</b>                                                                                                                                                                                                                                                                                                                                                                                                                                                                                                                                                                                                                                                  |             |                                                                                                                                                                                             |                         |    |
| Participant flow (a diagram is strongly recommended)                                                                                                                                                                                                                                                                                                                                                                                                                                                                                                                                                                                                            | 13a         | For each group, the numbers of participants who were randomly assigned, received intended treatment, and were analysed for the primary outcome                                              |                         | 12 |
|                                                                                                                                                                                                                                                                                                                                                                                                                                                                                                                                                                                                                                                                 | 13b         | For each group, losses and exclusions after randomisation, together with reasons                                                                                                            | 12                      |    |
| Recruitment                                                                                                                                                                                                                                                                                                                                                                                                                                                                                                                                                                                                                                                     | 14a         | Dates defining the periods of recruitment and follow-up                                                                                                                                     | 12                      |    |
|                                                                                                                                                                                                                                                                                                                                                                                                                                                                                                                                                                                                                                                                 | 14b         | Why the trial ended or was stopped                                                                                                                                                          | 14                      |    |
| Baseline data                                                                                                                                                                                                                                                                                                                                                                                                                                                                                                                                                                                                                                                   | 15          | A table showing baseline demographic and clinical characteristics for each group                                                                                                            | Table 1                 |    |
| Numbers analysed                                                                                                                                                                                                                                                                                                                                                                                                                                                                                                                                                                                                                                                | 16          | For each group, number of participants (denominator) included in each analysis and whether the analysis was by original assigned groups                                                     | 12                      |    |
| Outcomes and estimation                                                                                                                                                                                                                                                                                                                                                                                                                                                                                                                                                                                                                                         | 17a         | For each primary and secondary outcome, results for each group, and the estimated effect size and its precision (such as 95% CI)                                                            | 12-14                   |    |
|                                                                                                                                                                                                                                                                                                                                                                                                                                                                                                                                                                                                                                                                 | 17b         | For binary outcomes, presentation of both absolute and relative effect sizes is recommended                                                                                                 | N/A                     |    |
| Ancillary analyses                                                                                                                                                                                                                                                                                                                                                                                                                                                                                                                                                                                                                                              | 18          | Results of any other analyses performed, including subgroup analyses and adjusted analyses, distinguishing prespecified from exploratory                                                    | N/A                     |    |
| Harms                                                                                                                                                                                                                                                                                                                                                                                                                                                                                                                                                                                                                                                           | 19          | All important harms or unintended effects in each group (for specific guidance see CONSORT for harms <sup>38</sup> )                                                                        | 13-14                   |    |
| <b>Discussion</b>                                                                                                                                                                                                                                                                                                                                                                                                                                                                                                                                                                                                                                               |             |                                                                                                                                                                                             |                         |    |
| Limitations                                                                                                                                                                                                                                                                                                                                                                                                                                                                                                                                                                                                                                                     | 20          | Trial limitations, addressing sources of potential bias, imprecision, and, if relevant, multiplicity of analyses                                                                            | 14                      |    |
| Generalisability                                                                                                                                                                                                                                                                                                                                                                                                                                                                                                                                                                                                                                                | 21          | Generalisability (external validity, applicability) of the trial findings                                                                                                                   | 17-18                   |    |
| Interpretation                                                                                                                                                                                                                                                                                                                                                                                                                                                                                                                                                                                                                                                  | 22          | Interpretation consistent with results, balancing benefits and harms, and considering other relevant evidence                                                                               | 14-18                   |    |
| <b>Other information</b>                                                                                                                                                                                                                                                                                                                                                                                                                                                                                                                                                                                                                                        |             |                                                                                                                                                                                             |                         |    |
| Registration                                                                                                                                                                                                                                                                                                                                                                                                                                                                                                                                                                                                                                                    | 23          | Registration number and name of trial registry                                                                                                                                              | 9                       |    |
| Protocol                                                                                                                                                                                                                                                                                                                                                                                                                                                                                                                                                                                                                                                        | 24          | Where the full trial protocol can be accessed, if available                                                                                                                                 | N/A                     |    |
| Funding                                                                                                                                                                                                                                                                                                                                                                                                                                                                                                                                                                                                                                                         | 25          | Sources of funding and other support (such as supply of drugs), role of funders                                                                                                             | 4, 19                   |    |
| *We strongly recommend reading this statement in conjunction with the CONSORT 2010 Explanation and Elaboration <sup>13</sup> for important clarifications on all the items. If relevant, we also recommend reading CONSORT extensions for cluster randomised trials, <sup>11</sup> non-inferiority and equivalence trials, <sup>12</sup> non-pharmacological treatments, <sup>32</sup> herbal interventions, <sup>33</sup> and pragmatic trials. <sup>34</sup> Additional extensions are forthcoming: for those and for up-to-date references relevant to this checklist, see <a href="http://www.consort-statement.org">http://www.consort-statement.org</a> . |             |                                                                                                                                                                                             |                         |    |
| <b>Table: CONSORT 2010 checklist of information to include when reporting a randomised trial*</b>                                                                                                                                                                                                                                                                                                                                                                                                                                                                                                                                                               |             |                                                                                                                                                                                             |                         |    |
